# Supplementary material for: Amputation-free survival in 17,353 people at high risk for foot ulceration in diabetes: a national observational study
Source: PubMed Central journal article supplement (PMC6223842; doi:10.1007/s00125-018-4723-y), 2018-08-31
Supplement: 125_2018_4723_MOESM1_ESM.pdf [file 125_2018_4723_MOESM1_ESM.pdf]

ESM Figure 1: Plot to assess the proportional hazard assumption of ulcer groups using log negative-log survival curves.

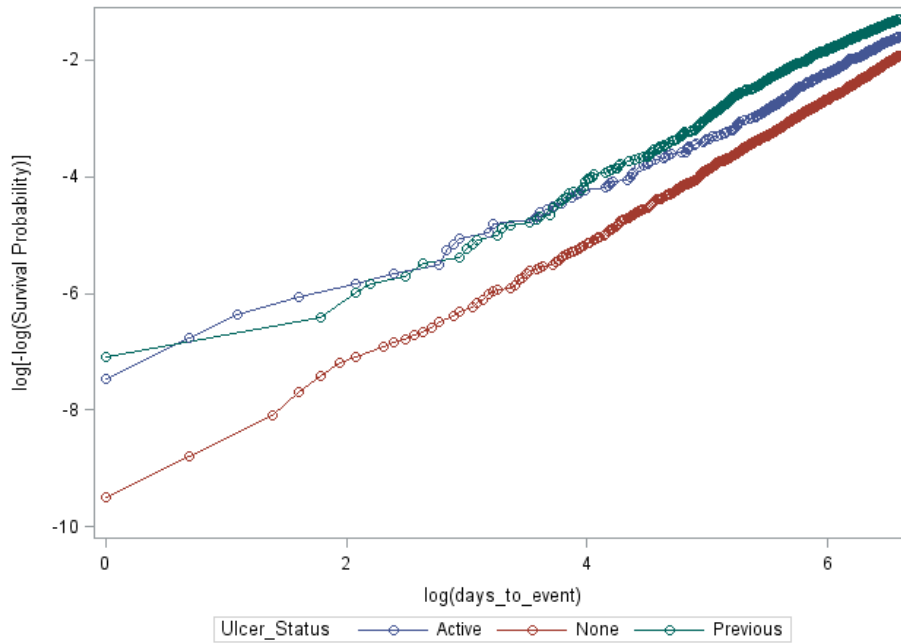

ESM Figure 2: Standardized Score Processes for active and healed ulcer group by Survival Time.

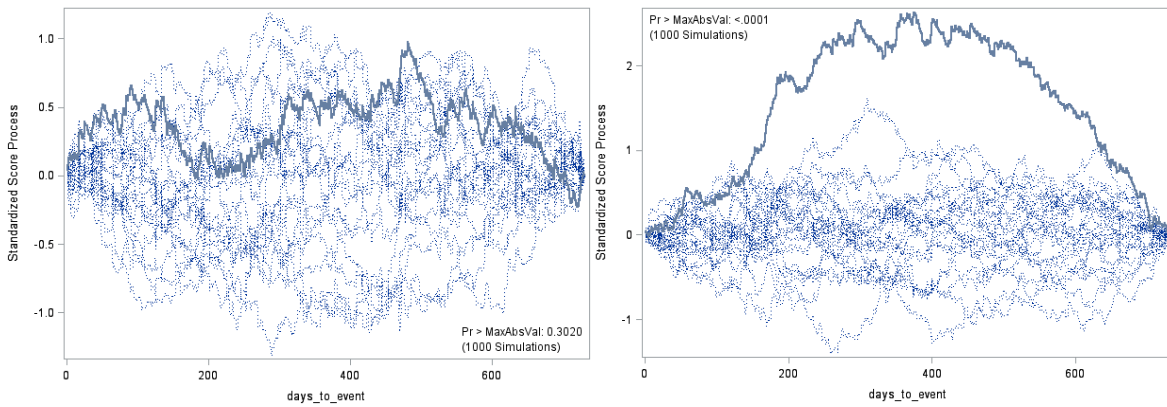

ESM Table 1: Analysis of Maximum Likelihood Estimates

| Parameter           | Chi-Square | Pr > ChiSq        | Hazard Ratio |
|---------------------|------------|-------------------|--------------|
| Ulcer status Active | 22.56      | <b>&lt;0.0001</b> | 1.83         |
| Healed              | 134.93     | <b>&lt;0.0001</b> | 3.07         |
| Active ulcer*time   | 5.31       | <b>0.0212</b>     | 1.00         |
| Healed ulcer*time   | 30.48      | <b>&lt;0.0001</b> | 1.00         |

**ESM Table 2: AIC statistics for the all the distributions**

| <b>Distribution</b> | <b>AIC</b> |
|---------------------|------------|
| Gamma               | 18533.27   |
| Log logistic        | 18528.14   |
| Weibull             | 18533.78   |
| Exponential         | 18610.76   |
| Log normal          | 18668.69   |
